# Supplementary material
Source: ML conference proceedings conference paper supplement (https://proceedings.mlr.press/v216/zhang23e.html)
Supplement: Supplementary file 1 [file zhang23e-supp.pdf]

---

# Greed is good: correspondence recovery for unlabeled linear regression

---

Hang Zhang, Ping Li

Cognitive Computing Lab  
Baidu Research  
10900 NE 8th St, Bellevue, WA 98004, USA  
{zhanghanghitomi, pingli98}@gmail.com

## 1 NOTATIONS

We start our discussion by defining  $\widehat{\mathbf{B}}$  and  $\widetilde{\mathbf{B}}$  respectively as

$$\begin{aligned}\widetilde{\mathbf{B}} &= (n - h)^{-1} \mathbf{X}^\top \mathbf{\Pi}^* \mathbf{X} \mathbf{B}^*, \\ \widehat{\mathbf{B}} &= (n - h)^{-1} \mathbf{X}^\top \mathbf{Y} = \widetilde{\mathbf{B}} + (n - h)^{-1} \mathbf{X}^\top \mathbf{W},\end{aligned}$$

where  $h$  is denoted as the Hamming distance between identity matrix  $\mathbf{I}$  and the ground truth selection matrix  $\mathbf{\Pi}^*$ , i.e.,  $h = d_H(\mathbf{I}, \mathbf{\Pi}^*)$ .

Here we modify the *leave-one-out* trick, which is previously used in Karoui [2013], Karoui et al. [2013], Karoui [2018], Chen et al. [2020], Sur et al. [2019]. First, we construct an independent copy  $\mathbf{X}'_{s,:}$  for each row  $\mathbf{X}_{s,:}$  (sth row of the sensing matrix  $\mathbf{X}$ ). Building on these independent copies, we construct the leave-one-out sample  $\mathbf{X}_{\setminus(s)}$  by replacing the  $s$ th row in the sensing matrix  $\mathbf{X}$  with its independent copy  $\mathbf{X}'_{s,:}$ . The detailed construction of independent copies  $\{\widetilde{\mathbf{B}}_{\setminus(s)}\}_{s=1}^n$  proceeds as

$$\widetilde{\mathbf{B}}_{\setminus(s)} = (n - h)^{-1} \left( \sum_{\substack{k \neq s \\ \pi^*(k) \neq s}} \mathbf{X}_{\pi(k),:} \mathbf{X}_{k,:}^\top + \sum_{\substack{k=s \text{ or} \\ \pi^*(k)=s}} \mathbf{X}'_{\pi(k),:} \mathbf{X}'_{k,:}{}^\top \right) \mathbf{B}^*.$$

Easily we can verify that  $\widetilde{\mathbf{B}}_{\setminus(i)}$  is independent of the  $i$ th row  $\mathbf{X}_{i,:}$ . Similarly, we construct the matrices  $\{\widetilde{\mathbf{B}}_{\setminus(s,t)}\}_{1 \leq s \neq t \leq n}$  as

$$\widetilde{\mathbf{B}}_{\setminus(s,t)} = (n - h)^{-1} \left( \sum_{\substack{k \neq s,t \\ \pi^*(k) \neq s,t}} \mathbf{X}_{\pi(k),:} \mathbf{X}_{k,:}^\top + \sum_{\substack{k=s \text{ or } k=t \text{ or} \\ \pi^*(k)=s \text{ or } \pi^*(k)=t}} \mathbf{X}'_{\pi(k),:} \mathbf{X}'_{k,:}{}^\top \right) \mathbf{B}^*,$$

and verify the independence between  $\widetilde{\mathbf{B}}_{\setminus(s,t)}$  and the rows  $\mathbf{X}_{s,:}, \mathbf{X}_{t,:}$ .

Moreover, we define the events  $\mathcal{E}_i$  as

$$\begin{aligned}\mathcal{E}_1(\mathbf{M}) &\triangleq \left\{ \left\| \mathbf{M}^\top \mathbf{X}_{i,:} \right\|_2 \lesssim \sqrt{\log n} \|\mathbf{M}\|_{\text{F}} \text{ and } \left\| \mathbf{M}^\top \mathbf{X}'_{i,:} \right\|_2 \lesssim \sqrt{\log n} \|\mathbf{M}\|_{\text{F}} \quad \forall 1 \leq i \leq n \right\}; \\ \mathcal{E}_{2,1} &\triangleq \left\{ \langle \mathbf{X}_{i,:}, \mathbf{X}'_{j,:} \rangle \lesssim \sqrt{p \log n}, \quad 1 \leq i, j \leq n \right\}; \\ \mathcal{E}_{2,2} &\triangleq \left\{ \langle \mathbf{X}_{i,:}, \mathbf{X}_{j,:} \rangle \lesssim \sqrt{p \log n}, \quad 1 \leq i \neq j \leq n \right\}; \\ \mathcal{E}_{2,3} &\triangleq \left\{ \langle \mathbf{X}'_{i,:}, \mathbf{X}'_{j,:} \rangle \lesssim \sqrt{p \log n}, \quad 1 \leq i, j \leq n \right\}; \\ \mathcal{E}_2 &= \mathcal{E}_{2,1} \cap \mathcal{E}_{2,2} \cap \mathcal{E}_{2,3};\end{aligned}$$

$$\begin{aligned}
\mathcal{E}_3 &= \left\{ \|\mathbf{X}_{s,:}\|_2 \leq \sqrt{p \log n} \text{ and } \|\mathbf{X}'_{s,:}\|_2 \leq \sqrt{p \log n}, \forall 1 \leq s \leq n \right\}; \\
\mathcal{E}_4 &= \left\{ \|\mathbf{X}\|_{\text{F}} \leq \sqrt{2np} \text{ and } \|\mathbf{X}_{\setminus(s)}\|_{\text{F}} \leq \sqrt{2np}, \forall 1 \leq s \leq n \right\}; \\
\mathcal{E}_5 &= \left\{ \|\mathbf{X}\mathbf{X}_{s,:}\|_2 \lesssim (\log n)\sqrt{np}, \forall 1 \leq s \leq n \right\}; \\
\mathcal{E}_{6,1} &= \left\{ \left\| \mathbf{B}^* - \tilde{\mathbf{B}}_{\setminus(s)} \right\|_{\text{F}} \lesssim \frac{(\log n)(\log n^2 p^3)\sqrt{p}}{\sqrt{n}} \|\mathbf{B}^*\|_{\text{F}}, \forall 1 \leq s \leq n \right\}; \\
\mathcal{E}_{6,2} &= \left\{ \left\| \mathbf{B}^* - \tilde{\mathbf{B}}_{\setminus(s,t)} \right\|_{\text{F}} \lesssim \frac{(\log n)(\log n^2 p^3)\sqrt{p}}{\sqrt{n}} \|\mathbf{B}^*\|_{\text{F}}, \forall 1 \leq s \neq t \leq n \right\}; \\
\mathcal{E}_6 &= \mathcal{E}_{6,1} \cap \mathcal{E}_{6,2}; \\
\mathcal{E}_7 &= \left\{ \left\| (\tilde{\mathbf{B}} - \tilde{\mathbf{B}}_{\setminus(s)})^\top \mathbf{X}_{s,:} \right\|_2 \lesssim \frac{p \log n}{n} \|\mathbf{B}^*\|_{\text{F}}, \forall 1 \leq s \leq n \right\}; \\
\mathcal{E}_8 &= \left\{ \left\| (\tilde{\mathbf{B}} - \tilde{\mathbf{B}}_{\setminus(s,t)})^\top \mathbf{X}_{s,:} \right\|_2 \lesssim \frac{p \log n}{n} \|\mathbf{B}^*\|_{\text{F}}, \forall 1 \leq s \neq t \leq n \right\}; \\
\mathcal{E}_9 &= \left\{ \left\| (\tilde{\mathbf{B}} - \mathbf{B}^*)^\top \mathbf{X}_{s,:} \right\|_2 \lesssim \frac{(\log n)^{3/2}(\log n^2 p^3)\sqrt{p}}{\sqrt{n}} \|\mathbf{B}^*\|_{\text{F}}, \forall 1 \leq s \leq n \right\}.
\end{aligned}$$

In addition, we define the quantities  $\Delta_1$ ,  $\Delta_2$ , and  $\Delta_3$  as

$$\Delta_1 = c_0 \sigma (\log n)^{5/2} \sqrt{\frac{p}{n}} \|\mathbf{B}^*\|_{\text{F}}; \quad (1)$$

$$\Delta_2 = c_1 \sigma (\log^2 n) \|\mathbf{B}^*\|_{\text{F}}; \quad (2)$$

$$\Delta_3 = c_2 \left[ \frac{mp(\log n)^2 \sigma^2}{n} + \sigma^2 (\log n)^2 \sqrt{\frac{mp}{n}} \right], \quad (3)$$

respectively. Besides, we define the summary  $\Delta$  as  $\Delta_1 + \Delta_2 + \Delta_3$ .

## 2 APPENDIX: PROOF OF THEOREM 2

*Proof.* We define the error event  $\mathcal{E}$  as

$$\mathcal{E} \triangleq \left\{ \|\mathbf{B}^{*\top} \mathbf{X}_{\pi^*(i)}\|_2^2 + \langle \mathbf{W}_i, \mathbf{B}^{*\top} \mathbf{X}_{\pi^*(i)} \rangle \leq \langle \mathbf{B}^{*\top} \mathbf{X}_{\pi^*(i)}, \mathbf{B}^{*\top} \mathbf{X}_j \rangle + \langle \mathbf{W}_i, \mathbf{B}^{*\top} \mathbf{X}_j \rangle, \forall j \neq \pi^*(i) \right\},$$

and complete the proof by showing  $\mathbb{P}(\mathcal{E}) \lesssim n^{-c}$ . To start with, we define three events  $\mathcal{E}_1$ ,  $\mathcal{E}_2$  and  $\mathcal{E}_3$  as

$$\begin{aligned}
\mathcal{E}_1 &\triangleq \left\{ \|\mathbf{B}^{*\top} \mathbf{X}_{\pi^*(i)}\|_2 \leq \frac{1}{2} \|\mathbf{B}^*\|_{\text{F}} \right\}; \\
\mathcal{E}_2 &\triangleq \left\{ \langle \mathbf{B}^{*\top} \mathbf{X}_{\pi^*(i)}, \mathbf{B}^{*\top} \mathbf{X}_j \rangle \gtrsim \log n \|\mathbf{B}^* \mathbf{B}^{*\top}\|_{\text{F}}, \forall j \neq \pi^*(i) \right\}; \\
\mathcal{E}_3 &\triangleq \left\{ \langle \mathbf{W}_i, \mathbf{B}^{*\top} (\mathbf{X}_j - \mathbf{X}_{\pi^*(i)}) \rangle \gtrsim \sigma \log n \|\mathbf{B}^*\|_{\text{F}}, \forall j \neq \pi^*(i) \right\},
\end{aligned}$$

respectively. The proof begins with the following decomposition, which reads as

$$\mathbb{E}\mathbb{1}(\mathcal{E}) = \mathbb{E}\mathbb{1}\left(\mathcal{E} \cap \bigcap_{i=1}^3 \bar{\mathcal{E}}_i\right) + \mathbb{E}\mathbb{1}\left(\bigcup_{i=1}^3 \mathcal{E}_i\right).$$

The subsequent proof can be divided into two parts.

**Part I.** We prove that  $\mathbb{E}\mathbb{1}\left(\mathcal{E} \cap \bigcap_{i=1}^3 \bar{\mathcal{E}}_i\right)$  is zero provided that  $\text{srank}(\mathbf{B}^*) \gtrsim \log^2 n$  and  $\text{SNR} \geq c$ . The underlying reason is as the following. To begin with, we obtain

$$\|\mathbf{B}^{*\top} \mathbf{X}_{\pi^*(i)}\|_2^2 \stackrel{\textcircled{1}}{\gtrsim} \|\mathbf{B}^*\|_{\text{F}}^2 \stackrel{\textcircled{2}}{\gtrsim} \frac{\log n}{\sqrt{\text{srank}(\mathbf{B}^*)}} \|\mathbf{B}^*\|_{\text{F}}^2 + \sigma \log n \|\mathbf{B}^*\|_{\text{F}}$$

$$\stackrel{\textcircled{3}}{\geq} \log n \|\mathbf{B}^* \mathbf{B}^{*\top}\|_{\text{F}} + \sigma \log n \|\mathbf{B}^*\|_{\text{F}}$$

where ① is due to  $\bar{\mathcal{E}}_1$ , ② is because of the assumption  $\text{srank}(\mathbf{B}^*) \gtrsim \log^2 n$  and  $\text{SNR} \geq c$ , and ③ results from the relation

$$\|\mathbf{B}^* \mathbf{B}^{*\top}\|_{\text{F}} \leq \|\mathbf{B}^*\|_{\text{OP}} \|\mathbf{B}^*\|_{\text{F}} = \frac{\|\mathbf{B}^*\|_{\text{F}}^2}{\sqrt{\text{srank}(\mathbf{B}^*)}}.$$

Condition on the event  $\bar{\mathcal{E}}_2 \cap \bar{\mathcal{E}}_3$ , we conclude

$$\|\mathbf{B}^{*\top} \mathbf{X}_{\pi^*(i)}\|_2^2 \gtrsim \langle \mathbf{B}^{*\top} \mathbf{X}_{\pi^*(i)}, \mathbf{B}^{*\top} \mathbf{X}_j \rangle + \langle \mathbf{W}_i, \mathbf{B}^{*\top} (\mathbf{X}_j - \mathbf{X}_{\pi^*(i)}) \rangle,$$

which is contradictory to the definition of  $\mathcal{E}$  and hence leads to  $\mathbb{E}\mathbb{1}(\mathcal{E} \cap \bigcap_{i=1}^3 \bar{\mathcal{E}}_i) = 0$ . Therefore we can invoke the union bound and upper-bound the error probability  $\mathbb{E}\mathbb{1}(\mathcal{E})$  as  $\sum_{i=1}^3 \mathbb{E}\mathbb{1}(\mathcal{E}_i)$ .

**Part II.** The following context separately bound the three terms  $\mathbb{E}\mathbb{1}(\mathcal{E}_i)$ ,  $1 \leq i \leq 3$ . For  $\mathbb{E}\mathbb{1}(\mathcal{E}_1)$ , we can simply invoke Lemma 15 and bound it as

$$\mathbb{E}\mathbb{1}\mathcal{E}_1 \lesssim e^{-\text{srank}(\mathbf{B}^*)} \stackrel{\textcircled{4}}{\lesssim} n^{-c},$$

where ④ is due to the assumption  $\text{srank}(\mathbf{B}^*) \gg \log^2 n$ .

Then we turn to bounding  $\mathbb{E}\mathbb{1}(\mathcal{E}_2)$ , which proceeds as

$$\begin{aligned} \mathbb{E}\mathbb{1}(\mathcal{E}_2) &\leq \mathbb{P}\left(\|\mathbf{B}^* \mathbf{B}^{*\top} \mathbf{X}_{\pi^*(i)}\|_2 \gtrsim \sqrt{\log n} \|\mathbf{B}^* \mathbf{B}^{*\top}\|_{\text{F}}\right) \\ &+ n \mathbb{E}_{\mathbf{X}_{\pi^*(i)}} \mathbb{1}\left(\|\mathbf{B}^* \mathbf{B}^{*\top} \mathbf{X}_{\pi^*(i)}\|_2 \lesssim \sqrt{\log n} \|\mathbf{B}^* \mathbf{B}^{*\top}\|_{\text{F}}, \langle \mathbf{B}^{*\top} \mathbf{X}_{\pi^*(i)}, \mathbf{B}^{*\top} \mathbf{X}_j \rangle \gtrsim \log n \|\mathbf{B}^* \mathbf{B}^{*\top}\|_{\text{F}}\right). \end{aligned} \quad (4)$$

For the first term in (4), we have

$$\mathbb{P}\left(\|\mathbf{B}^* \mathbf{B}^{*\top} \mathbf{X}_{\pi^*(i)}\|_2 \gtrsim \sqrt{\log n} \|\mathbf{B}^* \mathbf{B}^{*\top}\|_{\text{F}}\right) \lesssim n^{-c_0}.$$

While for the second term in (4), we exploit the independence between  $\mathbf{X}_{\pi^*(i)}$  and  $\mathbf{X}_j$ , which yields

$$\begin{aligned} &\mathbb{E}_{\mathbf{X}_{\pi^*(i)}} \mathbb{1}\left(\|\mathbf{B}^* \mathbf{B}^{*\top} \mathbf{X}_{\pi^*(i)}\|_2 \lesssim \sqrt{\log n} \|\mathbf{B}^* \mathbf{B}^{*\top}\|_{\text{F}}, \langle \mathbf{B}^{*\top} \mathbf{X}_{\pi^*(i)}, \mathbf{B}^{*\top} \mathbf{X}_j \rangle \gtrsim \log n \|\mathbf{B}^* \mathbf{B}^{*\top}\|_{\text{F}}\right) \\ &\lesssim \exp\left(-\frac{c_1 \log^2 n \|\mathbf{B}^* \mathbf{B}^{*\top}\|_{\text{F}}^2}{\log n \|\mathbf{B}^* \mathbf{B}^{*\top}\|_{\text{F}}^2}\right) \leq n^{-c_1}. \end{aligned}$$

Hence we conclude  $\mathbb{E}\mathbb{1}(\mathcal{E}_2) \lesssim n^{-c_0} + n \cdot n^{-c_1} \lesssim n^{-c_2}$ . In the end, we consider  $\mathbb{E}\mathbb{1}(\mathcal{E}_3)$ , which is written as

$$\mathbb{E}\mathbb{1}(\mathcal{E}_3) \leq \mathbb{P}\left(\|\mathbf{B}^{*\top} (\mathbf{X}_j - \mathbf{X}_{\pi^*(i)})\|_2 \leq \frac{\|\mathbf{B}^*\|_{\text{F}}}{2}, \exists j\right) + \mathbb{P}\left(\mathcal{E}_3, \|\mathbf{B}^{*\top} (\mathbf{X}_j - \mathbf{X}_{\pi^*(i)})\|_2 \geq \frac{\|\mathbf{B}^*\|_{\text{F}}}{2}, \forall j\right). \quad (5)$$

For the first term in (5), we invoke Lemma 15 and have

$$\mathbb{P}\left(\|\mathbf{B}^{*\top} (\mathbf{X}_j - \mathbf{X}_{\pi^*(i)})\|_2 \leq \frac{\|\mathbf{B}^*\|_{\text{F}}}{2}, \exists j\right) \stackrel{\textcircled{5}}{\leq} n \exp(-c \cdot \text{srank}(\mathbf{B}^*)) \stackrel{\textcircled{6}}{\lesssim} n^{-c},$$

where ⑤ is due to the union bound and ⑥ is due to the assumption such that  $\text{srank}(\mathbf{B}^*) \gg \log^2 n$ .

For the second term in (5), we exploit the independence across  $\mathbf{X}$  and  $\mathbf{W}$  and have

$$\mathbb{P}\left(\mathcal{E}_3, \|\mathbf{B}^{*\top} (\mathbf{X}_j - \mathbf{X}_{\pi^*(i)})\|_2 \geq \frac{\|\mathbf{B}^*\|_{\text{F}}}{2}, \forall j\right) \leq n \exp\left(-\frac{c \log^2 n \|\mathbf{B}^*\|_{\text{F}}^2}{\|\mathbf{B}^*\|_{\text{F}}^2}\right) \lesssim n^{-c}.$$

Summarizing the above discussion then completes the proof.  $\square$

### 3 PROOF OF THEOREM 3

Notice the reconstruction error, i.e.,  $\pi^*(i) \neq \hat{\pi}^*(i)$ , will occur as long as there exists  $j \neq \pi^*(i)$  such that

$$\langle \mathbf{Y}_{i,:}, \hat{\mathbf{B}}^\top \mathbf{X}_{\pi^*(i),:} \rangle \leq \langle \mathbf{Y}_{i,:}, \hat{\mathbf{B}}^\top \mathbf{X}_{j,:} \rangle. \quad (6)$$

With the relation  $\mathbf{Y}_{i,:} = \mathbf{B}^{*\top} \mathbf{X}_{\pi^*(i),:} + \mathbf{W}_{i,:}$  and  $\hat{\mathbf{B}} = \tilde{\mathbf{B}} + (n-h)^{-1} \mathbf{X}^\top \mathbf{W}$ , we can rewrite (6) as

$$\begin{aligned} & \left\langle \mathbf{B}^{*\top} \mathbf{X}_{\pi^*(i),:} + \mathbf{W}_{i,:}, \left( \tilde{\mathbf{B}} + (n-h)^{-1} \mathbf{X}^\top \mathbf{W} \right)^\top \mathbf{X}_{\pi^*(i),:} \right\rangle \\ & \leq \left\langle \mathbf{B}^{*\top} \mathbf{X}_{\pi^*(i),:} + \mathbf{W}_{i,:}, \left( \tilde{\mathbf{B}} + (n-h)^{-1} \mathbf{X}^\top \mathbf{W} \right)^\top \mathbf{X}_{j,:} \right\rangle. \end{aligned} \quad (7)$$

For the notation conciseness, we define terms  $\text{Term}_i$  ( $1 \leq i \leq 4$ ) as

$$\text{Term}_{\text{tot}} = \left\langle \mathbf{B}^{*\top} \mathbf{X}_{\pi^*(i),:}, \tilde{\mathbf{B}}^\top (\mathbf{X}_{\pi^*(i),:} - \mathbf{X}_{j,:}) \right\rangle; \quad (8)$$

$$\text{Term}_1 = (n-h)^{-1} \left\langle \mathbf{B}^{*\top} \mathbf{X}_{\pi^*(i),:}, \mathbf{W}^\top \mathbf{X} (\mathbf{X}_{j,:} - \mathbf{X}_{\pi^*(i),:}) \right\rangle; \quad (9)$$

$$\text{Term}_2 = \left\langle \mathbf{W}_{i,:}, \tilde{\mathbf{B}}^\top (\mathbf{X}_{j,:} - \mathbf{X}_{\pi^*(i),:}) \right\rangle; \quad (10)$$

$$\text{Term}_3 = (n-h)^{-1} \left\langle \mathbf{W}_{i,:}, \mathbf{W}^\top \mathbf{X} (\mathbf{X}_{j,:} - \mathbf{X}_{\pi^*(i),:}) \right\rangle. \quad (11)$$

Then (7) is equivalent to  $\text{Term}_{\text{tot}} \leq \text{Term}_1 + \text{Term}_2 + \text{Term}_3$ . With the union bound, we conclude

$$\begin{aligned} \mathbb{P}(\pi^*(i) \neq \hat{\pi}^*(i), \exists i) &= \mathbb{E} \left[ \mathbb{1}(\text{Term}_{\text{tot}} \leq \text{Term}_1 + \text{Term}_2 + \text{Term}_3, \exists i, j) \mathbb{1} \left( \bigcap_{a=1}^9 \mathcal{E}_a \right) \right] + \sum_{a=1}^9 \mathbb{P}(\bar{\mathcal{E}}_a) \\ &\stackrel{\textcircled{1}}{\leq} n^2 \mathbb{E} \left[ \mathbb{1}(\text{Term}_{\text{tot}} \leq \text{Term}_1 + \text{Term}_2 + \text{Term}_3) \mathbb{1} \left( \bigcap_{a=1}^9 \mathcal{E}_a \right) \right] + c_0 p^{-c_1} + c_2 n^{-c_3}, \end{aligned} \quad (12)$$

where in  $\textcircled{1}$  we invoke Lemma 5, Lemma 6, Lemma 7, Lemma 8, Lemma 9, Lemma 10, Lemma 11, and Lemma 12.

Regarding the term  $\mathbb{E} \left[ \mathbb{1}(\text{Term}_{\text{tot}} \leq \text{Term}_1 + \text{Term}_2 + \text{Term}_3, \exists i, j) \mathbb{1} \left( \bigcap_{a=1}^9 \mathcal{E}_a \right) \right]$ , we further decompose it as the summary of two terms reading as

$$\begin{aligned} & \mathbb{E} \left[ \mathbb{1}(\text{Term}_{\text{tot}} \leq \text{Term}_1 + \text{Term}_2 + \text{Term}_3) \mathbb{1} \left( \bigcap_{a=1}^9 \mathcal{E}_a \right) \right] \\ & \leq \mathbb{E} \left[ \mathbb{1}(\text{Term}_{\text{tot}} \leq \Delta) \mathbb{1} \left( \bigcap_{a=1}^9 \mathcal{E}_a \right) \right] \\ & + \mathbb{E} \left[ \mathbb{1}(\text{Term}_1 + \text{Term}_2 + \text{Term}_3 \geq \Delta) \mathbb{1} \left( \bigcap_{a=1}^9 \mathcal{E}_a \right) \right], \\ & \leq \mathbb{E} \left[ \mathbb{1}(\text{Term}_{\text{tot}} \leq \Delta) \mathbb{1} \left( \bigcap_{a=1}^9 \mathcal{E}_a \right) \right] + \mathbb{E} \left[ \mathbb{1}(\text{Term}_1 \geq \Delta_1) \mathbb{1} \left( \bigcap_{a=1}^9 \mathcal{E}_a \right) \right] \\ & + \mathbb{E} \left[ \mathbb{1}(\text{Term}_2 \geq \Delta_2) \mathbb{1} \left( \bigcap_{a=1}^9 \mathcal{E}_a \right) \right] + \mathbb{E} \left[ \mathbb{1}(\text{Term}_3 \geq \Delta_3) \mathbb{1} \left( \bigcap_{a=1}^9 \mathcal{E}_a \right) \right], \end{aligned} \quad (13)$$

where the definitions of  $\Delta_1$ ,  $\Delta_2$ ,  $\Delta_3$ , and  $\Delta$  are referred to Section 1. The proof is then completed by combining (12) and (13) and invoking Lemma 1, Lemma 2, Lemma 3, and Lemma 4.

**Lemma 1.** *Assume that  $\text{rank}(\mathbf{B}^*) \gg \log^4 n$ ,  $n \gtrsim p \log^6 n$ , and  $\text{SNR} \geq c$  and conditional on the intersection of events  $\mathcal{E}_1(\mathbf{B}^*) \cap \mathcal{E}_1(\mathbf{B}^* \tilde{\mathbf{B}}_{\setminus(\pi^*(i),j)}^\top) \cap \mathcal{E}_6 \cap \mathcal{E}_7$ , where indices  $\pi^*(i)$  and  $j$  are fixed. we have  $\text{Term}_{\text{tot}} \geq \Delta$  hold with probability exceeding  $1 - n^{-c}$  when  $n$  and  $p$  are sufficiently large, where  $\text{Term}_{\text{tot}}$  and  $\Delta$  are defined in (8) and Section 1, respectively.*

*Proof.* We start the discussion by decomposing  $\text{Term}_{\text{tot}}$  as

$$\text{Term}_{\text{tot}} = \underbrace{\|\mathbf{B}^{*\top} \mathbf{X}_{\pi^*(i),:}\|_2^2}_{\triangleq \text{Term}_{\text{tot},1}} + \underbrace{\langle \mathbf{B}^{*\top} \mathbf{X}_{\pi^*(i),:}, (\tilde{\mathbf{B}} - \mathbf{B}^*)^\top \mathbf{X}_{\pi^*(i),:} \rangle}_{\triangleq \text{Term}_{\text{tot},1}} - \underbrace{\langle \mathbf{B}^{*\top} \mathbf{X}_{\pi^*(i),:}, \tilde{\mathbf{B}}^\top \mathbf{X}_{j,:} \rangle}_{\triangleq \text{Term}_{\text{tot},2}}.$$

Then we obtain

$$\begin{aligned} \mathbb{P}(\text{Term}_{\text{tot}} \leq \Delta) &= \mathbb{P}\left(\frac{\Delta}{\|\mathbf{B}^{*\top} \mathbf{X}_{\pi^*(i),:}\|_2^2} - \frac{\text{Term}_{\text{tot},1}}{\|\mathbf{B}^{*\top} \mathbf{X}_{\pi^*(i),:}\|_2^2} + \frac{\text{Term}_{\text{tot},2}}{\|\mathbf{B}^{*\top} \mathbf{X}_{\pi^*(i),:}\|_2^2} \geq 1\right) \\ &\leq \underbrace{\mathbb{P}(\|\mathbf{B}^{*\top} \mathbf{X}_{\pi^*(i),:}\|_2 \leq \delta)}_{\triangleq \zeta_1} + \underbrace{\mathbb{P}\left(\frac{\Delta}{\delta^2} + \frac{|\text{Term}_{\text{tot},1}|}{\delta^2} + \frac{|\text{Term}_{\text{tot},2}|}{\delta^2} \geq 1\right)}_{\triangleq \zeta_2}. \end{aligned} \quad (14)$$

We separately bound the probabilities  $\zeta_1$  and  $\zeta_2$  by setting  $\delta$  as  $1/2\|\mathbf{B}^*\|_{\text{F}}$ . For the term  $\zeta_1$ , we invoke the small ball probability (Lemma 15) and conclude

$$\mathbb{P}\left(\|\mathbf{B}^{*\top} \mathbf{X}_{\pi^*(i),:}\|_2 \leq \frac{1}{2}\|\mathbf{B}^*\|_{\text{F}}\right) \leq e^{-c\text{rank}(\mathbf{B}^*)}. \quad (15)$$

For probability  $\zeta_2$ , we will prove it to be zero provided  $\text{SNR} \geq c$ . The proof is completed by showing

$$\frac{\Delta}{\delta^2} + \frac{|\text{Term}_{\text{tot},1}|}{\delta^2} + \frac{|\text{Term}_{\text{tot},2}|}{\delta^2} < 1$$

hold with probability  $1 - n^{-c}$ . Detailed calculation proceeds as follows.

**Phase I.** First, we consider term  $\text{Term}_{\text{tot},1}$ . Conditional on the intersection of events  $\mathcal{E}_1(\mathbf{B}^*) \cap \mathcal{E}_7 \cap \mathcal{E}_9$ , we have

$$\begin{aligned} |\text{Term}_{\text{tot},1}| &\leq \|\mathbf{B}^\top \mathbf{X}_{i,:}\|_2 \left\| (\tilde{\mathbf{B}} - \mathbf{B}^*)^\top \mathbf{X}_{\pi^*(i),:} \right\|_2 \lesssim \sqrt{\log n} \|\mathbf{B}^*\|_{\text{F}} \frac{(\log n)^{3/2} (\log n^2 p^3) \sqrt{p}}{\sqrt{n}} \|\mathbf{B}^*\|_{\text{F}} \\ &= (\log^2 n) (\log n^2 p^3) \sqrt{\frac{p}{n}} \|\mathbf{B}^*\|_{\text{F}}^2. \end{aligned}$$

**Phase II.** Then we turn to term  $\text{Term}_{\text{tot},2}$ . Adopting the leave-out-out trick, we can expand it as

$$\text{Term}_{\text{tot},2} = \underbrace{\langle \mathbf{B}^{*\top} \mathbf{X}_{\pi^*(i),:}, (\tilde{\mathbf{B}} - \tilde{\mathbf{B}}_{\setminus(\pi^*(i),j)})^\top \mathbf{X}_{j,:} \rangle}_{\text{Term}_{\text{tot},2,1}} + \underbrace{\langle \mathbf{B}^{*\top} \mathbf{X}_{\pi^*(i),:}, \tilde{\mathbf{B}}_{\setminus(\pi^*(i),j)}^\top \mathbf{X}_{j,:} \rangle}_{\text{Term}_{\text{tot},2,2}}.$$

For term  $\text{Term}_{\text{tot},2,1}$ , we have

$$\begin{aligned} \text{Term}_{\text{tot},2,1} &\leq \|\mathbf{B}^{*\top} \mathbf{X}_{\pi^*(i),:}\|_2 \left\| (\tilde{\mathbf{B}} - \tilde{\mathbf{B}}_{\setminus(\pi^*(i),j)})^\top \mathbf{X}_{j,:} \right\|_2 \stackrel{\textcircled{1}}{\lesssim} \sqrt{\log n} \|\mathbf{B}^*\|_{\text{F}} \frac{p \log n}{n} \|\mathbf{B}^*\|_{\text{F}} \\ &= \frac{p(\log n)^{3/2}}{n} \|\mathbf{B}^*\|_{\text{F}}^2, \end{aligned}$$

where in  $\textcircled{1}$  we condition on event  $\mathcal{E}_7$ . Regarding the term  $\text{Term}_{2,2,2}$ , we notice that  $\tilde{\mathbf{B}}_{\setminus(\pi^*(i),j)}$  is independent of the rows  $\mathbf{X}_{\pi^*(i),:}$  and  $\mathbf{X}_{j,:}$  due to its construction method. Then we can bound the term  $\text{Term}_{2,2,2}$  by fixing the rows  $\{\mathbf{X}_{s,:}\}_{s \neq \pi^*}$  and viewing  $\mathbf{X}_{\pi^*(i),:}$  as the RV, which yields

$$\text{Term}_{\text{tot},2,2} \lesssim \sqrt{\log n} \left\| \mathbf{B}^* \tilde{\mathbf{B}}_{\setminus(\pi^*(i),j)}^\top \mathbf{X}_{j,:} \right\|_2 \quad (16)$$

holds with probability  $1 - n^{-c}$ . Conditional on event  $\mathcal{E}_1(\mathbf{B}^* \tilde{\mathbf{B}}_{\setminus(\pi^*(i),j)}^\top)$ , we have

$$\text{Term}_{\text{tot},2,2} \lesssim (\log n) \left\| \mathbf{B}^* \tilde{\mathbf{B}}_{\setminus(\pi^*(i),j)}^\top \right\|_{\text{F}} \lesssim (\log n) \|\mathbf{B}^*\|_{\text{OP}} \left\| \tilde{\mathbf{B}}_{\setminus(\pi^*(i),j)}^\top \right\|_{\text{F}}$$

$$\stackrel{\textcircled{2}}{\leq} (\log n) \|\mathbf{B}^*\|_{\text{OP}} \left[ \left\| \tilde{\mathbf{B}}_{\setminus(\pi^*(i),j)} - \mathbf{B}^* \right\|_{\text{F}} + \|\mathbf{B}^*\|_{\text{F}} \right] \stackrel{\textcircled{3}}{\lesssim} \frac{(\log n) \|\mathbf{B}^*\|_{\text{F}}^2}{\sqrt{\text{srank}(\mathbf{B}^*)}},$$

where in  $\textcircled{2}$  we use the definition of stable rank, and in  $\textcircled{3}$  we conditional on event  $\mathcal{E}_6$ ,  $n \geq p$ , and  $n \gtrsim p \log^6 n$ .

**Phase III.** Conditional on (16), we can expand the sum  $\Delta/\delta^2 + \text{Term}_{\text{tot},1}/\delta^2 + \text{Term}_{\text{tot},2}/\delta^2$  as

$$\begin{aligned} \frac{\Delta}{\delta^2} + \frac{\text{Term}_{\text{tot},1}}{\delta^2} + \frac{\text{Term}_{\text{tot},2}}{\delta^2} &= c_0 \sigma (\log n)^{5/2} \sqrt{\frac{p}{n}} \frac{1}{\|\mathbf{B}^*\|_{\text{F}}} + \frac{c_1 \sigma (\log^2 n)}{\|\mathbf{B}^*\|_{\text{F}}} + c_2 \left( \frac{pm}{n} + \sqrt{\frac{mp}{n}} \right) \frac{(\log n)^2 \sigma^2}{\|\mathbf{B}^*\|_{\text{F}}^2} \\ &\quad + \frac{c_3 (\log^2 n) (\log n^2 p^3) \sqrt{p}}{\sqrt{n}} + \frac{c_4 p (\log n)^{3/2}}{n} + \frac{c_5 \log n}{\sqrt{\text{srank}(\mathbf{B}^*)}} \\ &\asymp c_0 \sqrt{\frac{p}{nm}} \frac{(\log n)^{5/2}}{\sqrt{\text{SNR}}} + \frac{c_1 \log^2 n}{\sqrt{m \cdot \text{SNR}}} + \frac{c_2 p (\log n)^2}{n \cdot \text{SNR}} + c_2 \sqrt{\frac{p}{mn}} \frac{(\log n)^2}{\text{SNR}} \\ &\quad + \frac{c_3 (\log^2 n) (\log n^2 p^3) \sqrt{p}}{\sqrt{n}} + \frac{c_4 p (\log n)^{3/2}}{n} + \frac{c_5 \log n}{\sqrt{\text{srank}(\mathbf{B}^*)}}. \end{aligned}$$

Provided that  $\text{SNR} \geq c$ ,  $\text{srank}(\mathbf{B}^*) \gg \log^4 n$  and  $n \gtrsim p \log^6 n$ , we can verify the sum  $\Delta/\delta^2 + \text{Term}_{\text{tot},1}/\delta^2 + \text{Term}_{\text{tot},2}/\delta^2$  to be significantly smaller than 1 when  $n$  and  $p$  are sufficiently large, which suggests

$$\zeta_2 \leq \mathbb{P} \left( \text{Term}_{\text{tot},2,2} \gtrsim \sqrt{\log n} \left\| \mathbf{B}^* \tilde{\mathbf{B}}_{\setminus(\pi^*(i),j)}^\top \mathbf{X}_{j,:} \right\|_2 \right) \leq n^{-c}.$$

Hence the proof is completed by combining (14) and (15).  $\square$

**Remark 1.** If we strength the requirement on SNR from  $\text{SNR} \geq c$  to  $\text{SNR} \gtrsim \log^2 n$ , we can relax the requirement on the stable rank  $\text{srank}(\mathbf{B}^*)$  from  $\text{srank}(\mathbf{B}^*) \gg \log^4 n$  to  $\text{srank}(\mathbf{B}^*) \gg \log^2 n$ .

**Lemma 2.** Conditional on the intersection of events  $\mathcal{E}_3 \cap \mathcal{E}_4 \cap \mathcal{E}_5$  and fixing the indices  $\pi^*(i)$  and  $j$ , we have

$$\text{Term}_1 \lesssim \sigma (\log n)^{5/2} \sqrt{\frac{p}{n}} \|\mathbf{B}^*\|_{\text{F}}.$$

hold with probability at least  $1 - n^{-c}$ .

*Proof.* Define vectors  $\mathbf{u}_{\mathbf{X}}$  and  $\mathbf{v}_{\mathbf{X}}^\top$  as

$$\begin{aligned} \mathbf{u}_{\mathbf{X}} &= \mathbf{X} (\mathbf{X}_{j,:} - \mathbf{X}_{\pi^*(i),:}), \\ \mathbf{v}_{\mathbf{X}} &= \mathbf{B}^{*\top} \mathbf{X}_{\pi^*(i),:}, \end{aligned}$$

respectively. We can rewrite  $\text{Term}_1$  as

$$\text{Term}_1 = (n-h)^{-1} \text{Tr} \left[ \mathbf{X} (\mathbf{X}_{j,:} - \mathbf{X}_{\pi^*(i),:}) \mathbf{X}_{\pi^*(i),:}^\top \mathbf{B}^* \mathbf{W}^\top \right] = (n-h)^{-1} \mathbf{u}_{\mathbf{X}}^\top \mathbf{W} \mathbf{v}_{\mathbf{X}}.$$

Invoking the union bound, we conclude

$$\begin{aligned} &\mathbb{P} \left( \text{Term}_1 \gtrsim \sigma (\log n)^{5/2} \sqrt{\frac{p}{n}} \|\mathbf{B}^*\|_{\text{F}} \right) \\ &\leq \mathbb{P} \left( \text{Term}_1 \gtrsim \sigma (\log n)^{5/2} \sqrt{\frac{p}{n}} \|\mathbf{B}^*\|_{\text{F}}, \|\mathbf{u}_{\mathbf{X}}\|_2 \|\mathbf{v}_{\mathbf{X}}\|_2 \lesssim (\log n)^{3/2} \sqrt{np} \|\mathbf{B}^*\|_{\text{F}} \right) \\ &\quad + \mathbb{P} \left( \|\mathbf{u}_{\mathbf{X}}\|_2 \|\mathbf{v}_{\mathbf{X}}\|_2 \gtrsim (\log n)^{3/2} \sqrt{np} \|\mathbf{B}^*\|_{\text{F}} \right) \\ &\leq \underbrace{\mathbb{P} \left( \text{Term}_1 \gtrsim \frac{\sigma (\log n) \|\mathbf{u}_{\mathbf{X}}\|_2 \|\mathbf{v}_{\mathbf{X}}\|_2}{n-h} \right)}_{\triangleq \zeta_1} + \underbrace{\mathbb{P} \left( \|\mathbf{u}_{\mathbf{X}}\|_2 \|\mathbf{v}_{\mathbf{X}}\|_2 \gtrsim (\log n)^{3/2} \sqrt{np} \|\mathbf{B}^*\|_{\text{F}} \right)}_{\triangleq \zeta_2}. \end{aligned} \tag{17}$$

Then we separately bound the probabilities  $\zeta_1$  and  $\zeta_2$ .

**Phase I.** For probability  $\zeta_1$ , we exploit the independence between  $\mathbf{X}$  and  $\mathbf{W}$  and can view  $\text{Term}_1$  as a Gaussian RV conditional on  $\mathbf{X}$ , since it is a linear combination of Gaussian RVs  $\{\mathbf{W}_{i,j}\}_{1 \leq i \leq n, 1 \leq j \leq m}$ . Easily we can calculate its mean to be zero and its variance as

$$\mathbb{E}_{\mathbf{W}}(\text{Term}_1)^2 = \frac{\sigma^2}{(n-h)^2} \|\mathbf{u}_{\mathbf{X}}\|_2 \|\mathbf{v}_{\mathbf{X}}\|_2^2.$$

Thus we can upper-bound  $\zeta_1$  as

$$\zeta_1 = \mathbb{E}_{\mathbf{X}} \mathbb{E}_{\mathbf{W}} \mathbb{1} \left( \text{Term}_1 \gtrsim \frac{\sigma(\log n) \|\mathbf{u}_{\mathbf{X}}\|_2 \|\mathbf{v}_{\mathbf{X}}\|_2}{n-h} \right) \stackrel{\textcircled{1}}{\leq} \mathbb{E}_{\mathbf{X}} \exp(-c_0 \log n) = n^{-c}, \quad (18)$$

where  $\textcircled{1}$  is due to the bound on the tail-probability of Gaussian RV.

**Phase II.** As for  $\zeta_2$ , easily we can verify it to be zero conditional on the intersection of events  $\mathcal{E}_3 \cap \mathcal{E}_4 \cap \mathcal{E}_5$  as

$$\|\mathbf{u}_{\mathbf{X}}\|_2 \|\mathbf{v}_{\mathbf{X}}\|_2 \lesssim \sqrt{\log n} \|\mathbf{B}^*\|_{\text{F}} \cdot (\|\mathbf{X}\mathbf{X}_{j,:}\|_2 + \|\mathbf{X}\mathbf{X}_{\pi^*(i),:}\|_2) \lesssim (\log n)^{3/2} \sqrt{np} \|\mathbf{B}^*\|_{\text{F}}.$$

The proof is then completed by combining (17) and (18).  $\square$

**Lemma 3.** *Conditional on the intersection of events  $\mathcal{E}_2 \cap \mathcal{E}_3 \cap \mathcal{E}_4 \cap \mathcal{E}_6$  and fixing the indices  $\pi^*(i)$  and  $j$ , we have  $\text{Term}_2 \leq \sigma(\log n)^2 \|\mathbf{B}^*\|_{\text{F}}$  hold with probability at least  $1 - n^{-c}$ .*

*Proof.* Following a similar proof strategy as in Lemma 3, we first invoke the union bound and obtain

$$\begin{aligned} & \mathbb{P}(\text{Term}_2 \gtrsim \sigma(\log n)^2 \|\mathbf{B}^*\|_{\text{F}}) \\ & \leq \mathbb{P}\left(\text{Term}_2 \gtrsim \sigma(\log n)^2 \|\mathbf{B}^*\|_{\text{F}}, \left\| \tilde{\mathbf{B}}^\top (\mathbf{X}_{j,:} - \mathbf{X}_{\pi^*(i),:}) \right\|_2 \lesssim (\log n) \|\mathbf{B}^*\|_{\text{F}}\right) \\ & + \mathbb{P}\left(\left\| \tilde{\mathbf{B}}^\top (\mathbf{X}_{j,:} - \mathbf{X}_{\pi^*(i),:}) \right\|_2 \gtrsim (\log n) \|\mathbf{B}^*\|_{\text{F}}\right) \\ & \leq \underbrace{\mathbb{P}\left(\text{Term}_2 \gtrsim \sigma(\log n) \left\| \tilde{\mathbf{B}}^\top (\mathbf{X}_{j,:} - \mathbf{X}_{\pi^*(i),:}) \right\|_2\right)}_{\zeta_1} + \underbrace{\mathbb{P}\left(\left\| \tilde{\mathbf{B}}^\top (\mathbf{X}_{j,:} - \mathbf{X}_{\pi^*(i),:}) \right\|_2 \gtrsim (\log n) \|\mathbf{B}^*\|_{\text{F}}\right)}_{\zeta_2}. \end{aligned} \quad (19)$$

The following analysis separately investigates the two probabilities  $\zeta_1$  and  $\zeta_2$ .

**Phase I.** Exploiting the independence between  $\mathbf{X}$  and  $\mathbf{W}$ , we can bound  $\zeta_1$  as

$$\zeta_1 = \mathbb{E}_{\mathbf{X}} \mathbb{E}_{\mathbf{W}} \mathbb{1} \left( \text{Term}_2 \gtrsim \sigma(\log n) \left\| \tilde{\mathbf{B}}^\top (\mathbf{X}_{j,:} - \mathbf{X}_{\pi^*(i),:}) \right\|_2 \right) \stackrel{\textcircled{1}}{\leq} \mathbb{E}_{\mathbf{X}} \exp(-c_0 \log n) = n^{-c_0}, \quad (20)$$

where in  $\textcircled{1}$  we use the fact that  $\text{Term}_2$  is a Gaussian RV with zero mean and  $\left\| \tilde{\mathbf{B}}^\top (\mathbf{X}_{j,:} - \mathbf{X}_{\pi^*(i),:}) \right\|_2$  conditional on  $\mathbf{X}$ .

**Phase II.** Then we bound term  $\zeta_2$ . Notice

$$\begin{aligned} \left\| \tilde{\mathbf{B}}^\top (\mathbf{X}_{j,:} - \mathbf{X}_{\pi^*(i),:}) \right\|_2 & \leq \left\| \left( \tilde{\mathbf{B}} - \tilde{\mathbf{B}}_{\setminus(\pi^*(i),j)} \right)^\top (\mathbf{X}_{j,:} - \mathbf{X}_{\pi^*(i),:}) \right\|_2 + \left\| \tilde{\mathbf{B}}_{\setminus(\pi^*(i),j)}^\top (\mathbf{X}_{j,:} - \mathbf{X}_{\pi^*(i),:}) \right\|_2 \\ & \leq \left\| \left( \tilde{\mathbf{B}} - \tilde{\mathbf{B}}_{\setminus(\pi^*(i),j)} \right)^\top \mathbf{X}_{j,:} \right\|_2 + \left\| \left( \tilde{\mathbf{B}} - \tilde{\mathbf{B}}_{\setminus(\pi^*(i),j)} \right)^\top \mathbf{X}_{\pi^*(i),:} \right\|_2 \\ & + \left\| \tilde{\mathbf{B}}_{\setminus(\pi^*(i),j)}^\top (\mathbf{X}_{j,:} - \mathbf{X}_{\pi^*(i),:}) \right\|_2, \end{aligned}$$

we conclude

$$\begin{aligned} \zeta_2 & \stackrel{\textcircled{2}}{\leq} \underbrace{\mathbb{P}\left(\left\| \left( \tilde{\mathbf{B}} - \tilde{\mathbf{B}}_{\setminus(\pi^*(i),j)} \right)^\top \mathbf{X}_{j,:} \right\|_2 + \left\| \left( \tilde{\mathbf{B}} - \tilde{\mathbf{B}}_{\setminus(\pi^*(i),j)} \right)^\top \mathbf{X}_{\pi^*(i),:} \right\|_2 \gtrsim \frac{p \log n}{n} \|\mathbf{B}^*\|_{\text{F}}\right)}_{\zeta_{2,1}} \\ & + \underbrace{\mathbb{P}\left(\left\| \tilde{\mathbf{B}}_{\setminus(\pi^*(i),j)}^\top (\mathbf{X}_{j,:} - \mathbf{X}_{\pi^*(i),:}) \right\|_2 \gtrsim (\log n) \|\mathbf{B}^*\|_{\text{F}}\right)}_{\zeta_{2,2}}, \end{aligned} \quad (21)$$

where in ② we use the fact  $n \gtrsim p$ . Invoking Lemma 11 then yields  $\zeta_{2,1} = 0$ . For term  $\zeta_{2,2}$ , we exploit the independence between  $\tilde{\mathbf{B}}_{\setminus(\pi^*(i),j)}$  and  $\mathbf{X}_{j,:}, \mathbf{X}_{\pi^*(i),:}$ . Via the Hanson-wright inequality [Vershynin, 2018], we have

$$\zeta_{2,2} \leq \exp \left[ -c_0 \left( \frac{(\log n)^2 \|\mathbf{B}^*\|_F^2}{\left\| \tilde{\mathbf{B}}_{\setminus(\pi^*(i),j)}^\top \tilde{\mathbf{B}}_{\setminus(\pi^*(i),j)} \right\|_{\text{OP}}} \wedge \frac{(\log n)^4 \|\mathbf{B}^*\|_F^4}{\left\| \tilde{\mathbf{B}}_{\setminus(\pi^*(i),j)}^\top \tilde{\mathbf{B}}_{\setminus(\pi^*(i),j)} \right\|_F^2} \right) \right] \stackrel{\textcircled{3}}{\leq} n^{-c}, \quad (22)$$

where ③ is due to the fact

$$\left\| \tilde{\mathbf{B}}_{\setminus(\pi^*(i),j)} \right\|_F \leq \|\mathbf{B}^*\|_F + \left\| \tilde{\mathbf{B}}_{\setminus(\pi^*(i),j)} - \mathbf{B}^* \right\|_F \stackrel{\textcircled{4}}{\lesssim} \|\mathbf{B}^*\|_F,$$

and in ④ we condition on event  $\mathcal{E}_6$ . Combining (19), (20), (21), and (22) then completes the proof.  $\square$

**Lemma 4.** *Conditional on event  $\mathcal{E}_2$  and fixing the indices  $\pi^*(i)$  and  $j$ , we have  $\text{Term}_3 \lesssim \frac{mp(\log n)^2 \sigma^2}{n} + \sigma^2 (\log n)^2 \sqrt{\frac{mp}{n}}$  hold with probability exceeding  $1 - c_0 n^{-c_1}$ .*

*Proof.* For the benefits of presentation, we first define  $\Xi^{\pi^*(i),j}$  as  $\Xi^{\pi^*(i),j} = \mathbf{X}(\mathbf{X}_{\pi^*(i),:} - \mathbf{X}_{j,:})$ . Then we can rewrite  $\text{Term}_3$  as  $(n-h)^{-1} \mathbf{W}_{i,:}^\top \mathbf{W}^\top \Omega^{\pi^*(i),j}$  and expand it as

$$\begin{aligned} |\text{Term}_3| &= (n-h)^{-1} \left| \Xi_i^{\pi^*(i),j} \mathbf{W}_{i,:}^\top \mathbf{W}_{i,:} + \mathbf{W}_{i,:}^\top \left( \sum_{k \neq i} \Xi_k^{\pi^*(i),j} \mathbf{W}_{k,:} \right) \right| \\ &\leq \frac{1}{n-h} \left| \Xi_i^{\pi^*(i),j} \right| \cdot \|\mathbf{W}_{i,:}\|_2^2 + \frac{1}{n-h} \left| \left\langle \mathbf{W}_{i,:}, \sum_{k \neq i} \Xi_k^{\pi^*(i),j} \mathbf{W}_{k,:} \right\rangle \right| \\ &\stackrel{\textcircled{1}}{\leq} \frac{p \log n}{n-h} \|\mathbf{W}_{i,:}\|_2^2 + \frac{1}{n-h} \left| \left\langle \mathbf{W}_{i,:}, \sum_{k \neq i} \Xi_k^{\pi^*(i),j} \mathbf{W}_{k,:} \right\rangle \right|, \end{aligned}$$

where in ① we condition on event  $\mathcal{E}_2$  and have  $\left| \Xi_i^{\pi^*(i),j} \right| \leq \|\mathbf{X}_{\pi^*(i),:}\|_2^2 + \|\mathbf{X}_{j,:}\|_2^2 \lesssim p \log n$ . With the union bound, we obtain

$$\begin{aligned} &\mathbb{P} \left( \text{Term}_3 \gtrsim \frac{mp(\log n)^2 \sigma^2}{n} + \sigma^2 (\log n)^2 \sqrt{\frac{mp}{n}} \right) \\ &\stackrel{\textcircled{2}}{\leq} \underbrace{\mathbb{P} \left( \frac{p \log n}{n-h} \|\mathbf{W}_{i,:}\|_2^2 \gtrsim \frac{mp(\log n)^2 \sigma^2}{n} \right)}_{\triangleq \zeta_1} + \underbrace{\mathbb{P} \left( \frac{1}{n-h} \left| \left\langle \mathbf{W}_{i,:}, \sum_{k \neq i} \Omega_k^{\pi^*(i),j} \mathbf{W}_{k,:} \right\rangle \right| \gtrsim \sigma^2 (\log n)^2 \sqrt{\frac{mp}{n}} \right)}_{\triangleq \zeta_2}. \quad (23) \end{aligned}$$

Then we separately bound the two terms  $\zeta_1$  and  $\zeta_2$ .

**Phase I.** For term  $\zeta_1$ , we have

$$\zeta_1 \leq \mathbb{P} \left( \|\mathbf{W}_{i,:}\|_2^2 \gtrsim m(\log n) \sigma^2 \right) \stackrel{\textcircled{3}}{=} e^{-c_0 \log n} = n^{-c_0}, \quad (24)$$

where in ③ we use the fact that  $\|\mathbf{W}_{i,:}\|_2^2 / \sigma^2$  is a  $\chi^2$ -RV with freedom  $m$  and invoke Lemma 13.

**Phase II.** Then we upper-bound  $\zeta_2$  as

$$\zeta_2 \leq \underbrace{\mathbb{P} \left( \frac{1}{n-h} \left| \left\langle \mathbf{W}_{i,:}, \sum_{k \neq i} \Omega_k^{\pi^*(i),j} \mathbf{W}_{k,:} \right\rangle \right| \gtrsim \frac{\sigma \sqrt{\log n}}{n} \left\| \sum_{k \neq i} \Xi_k^{\pi^*(i),j} \mathbf{W}_{k,:} \right\|_2 \right)}_{\triangleq \zeta_{2,1}}$$



$$+ \underbrace{\mathbb{P} \left( \left\| \sum_{k \neq i} \Xi_k^{\pi^*(i),j} \mathbf{W}_{k,:} \right\|_2^2 \gtrsim mnp(\log n)^3 \sigma^2 \right)}_{\triangleq \zeta_{2,2}}. \quad (25)$$

For term  $\zeta_{2,1}$ , we exploit the independence across the rows of the matrix  $\mathbf{W}$ . Conditional on  $\{\mathbf{W}_{k,:}\}_{k \neq i}$ , we conclude the inner-product  $\langle \mathbf{W}_{i,:}, \sum_{k \neq i} \Xi_k^{\pi^*(i),j} \mathbf{W}_{k,:} \rangle$  to be a Gaussian RV with zero mean and  $\left\| \sum_{k \neq i} \Xi_k^{\pi^*(i),j} \mathbf{W}_{k,:} \right\|_2^2$  variance, which yields  $\zeta_{2,1} \leq n^{-c}$ . For term  $\zeta_{2,2}$ , we analyze the variance  $\left\| \sum_{k \neq i} \Xi_k^{\pi^*(i),j} \mathbf{W}_{k,:} \right\|_2^2$ , which reads as

$$\begin{aligned} \zeta_{2,2} &\leq \underbrace{\mathbb{P} \left( \left\| \sum_{k \neq i} \Xi_k^{\pi^*(i),j} \mathbf{W}_{k,:} \right\|_2^2 \gtrsim m(\log n)\sigma^2 \left[ \sum_{k \neq i} (\Xi_k^{\pi^*(i),j})^2 \right], \sum_{k \neq i} (\Xi_k^{\pi^*(i),j})^2 \lesssim (\log n)^2 np \right)}_{\triangleq \zeta_{2,2,1}} \\ &+ \underbrace{\mathbb{P} \left( \sum_{k \neq i} (\Xi_k^{\pi^*(i),j})^2 \gtrsim (\log n)^2 np \right)}_{\triangleq \zeta_{2,2,2}}. \end{aligned} \quad (26)$$

Due to the independence across  $\mathbf{X}$  and  $\mathbf{W}$ , we can verify  $\left\| \sum_{k \neq i} \Xi_k^{\pi^*(i),j} \mathbf{W}_{k,:} \right\|_2^2 / [\sigma^2 \sum_{k \neq i} (\Xi_k^{\pi^*(i),j})^2]$  to be a  $\chi^2$ -RV with freedom  $m$  conditional on  $\mathbf{X}$ . Invoking Lemma 13, we can upper-bound  $\xi_1$  as

$$\zeta_{2,2,1} \leq \mathbb{P} \left( \left\| \sum_{k \neq i} \Xi_k^{\pi^*(i),j} \mathbf{W}_{k,:} \right\|_2^2 \gtrsim m(\log n)\sigma^2 \left[ \sum_{k \neq i} (\Xi_k^{\pi^*(i),j})^2 \right] \right) \leq n^{-c}. \quad (27)$$

As for  $\xi_2$ , we condition on event  $\mathcal{E}_5$  and have

$$\zeta_{2,2,2} \leq \mathbb{P} \left( \|\mathbf{X}\mathbf{X}_{\pi^*(i),:}\|_2 + \|\mathbf{X}\mathbf{X}_{j,:}\|_2 \gtrsim (\log n)\sqrt{np} \right) = 0. \quad (28)$$

Then the proof is complete by combining (23), (24), (25), (26), (27), and (28).  $\square$

## 4 SUPPORTING LEMMAS

**Lemma 5.** *For an arbitrary row  $\mathbf{X}_{i,:}$ , we have*

$$\|\mathbf{B}^{*\top} \mathbf{X}_{i,:}\|_2 \lesssim \sqrt{\log n} \|\mathbf{B}^*\|_{\text{F}},$$

with probability exceeding  $1 - n^{-c}$ .

*Proof.* This lemma is a direct consequence of the Hanson-wright inequality [Vershynin, 2018]. Easily we can verify  $\mathbb{E} \|\mathbf{B}^{*\top} \mathbf{X}_{i,:}\|_2^2 = \|\mathbf{M}\|_{\text{F}}^2$  and hence

$$\begin{aligned} \mathbb{P} \left( \|\mathbf{B}^{*\top} \mathbf{X}_{i,:}\|_2^2 \gtrsim \log n \|\mathbf{B}^*\|_{\text{F}}^2 \right) &\leq \mathbb{P} \left( \left| \|\mathbf{B}^{*\top} \mathbf{X}_{i,:}\|_2^2 - \|\mathbf{B}^*\|_{\text{F}}^2 \right| \gtrsim (\log n) \|\mathbf{B}^*\|_{\text{F}}^2 \right) \\ &\leq \exp \left( -c_0 \min \left( \frac{\log n \|\mathbf{B}^*\|_{\text{F}}^2}{\|\mathbf{B}^*\|_{\text{OP}}^2} \wedge \frac{(\log^2 n) \|\mathbf{B}^*\|_{\text{F}}^4}{\|\mathbf{B}^*\|_{\text{F}}^4} \right) \right) \leq n^{-1-c}. \end{aligned}$$

Adopting the union bound, we have

$$\mathbb{P} \left( \|\mathbf{B}^{*\top} \mathbf{X}_{i,:}\|_2^2 \gtrsim \log n \|\mathbf{B}^*\|_{\text{F}}^2, \forall i \right) \leq n \cdot n^{-1-c} = n^{-c}.$$

$\square$

**Lemma 6.** For an arbitrary row  $\mathbf{X}_{i,:}$ , (or  $\mathbf{X}'_{i,:}$ ), we have

$$\begin{aligned}\langle \mathbf{X}_{i_1,:}, \mathbf{X}'_{j_1,:} \rangle &\lesssim \sqrt{p \log n}; \\ \langle \mathbf{X}_{i_2,:}, \mathbf{X}_{j_2,:} \rangle &\lesssim \sqrt{p \log n}, \quad i_2 \neq j_2; \\ \langle \mathbf{X}'_{i_3,:}, \mathbf{X}'_{j_3,:} \rangle &\lesssim \sqrt{p \log n}, \quad i_3 \neq j_3,\end{aligned}$$

hold with probability  $1 - n^{-c}$ .

**Lemma 7.** We conclude  $\mathbb{P}(\mathcal{E}_4) \geq 1 - 1 - ne^{-cnp}$ .

This lemma is a direct consequence of Lemma 13 and hence its proof is omitted.

**Lemma 8.** Conditional on the intersection of events  $\mathcal{E}_2 \cap \mathcal{E}_3 \cap \mathcal{E}_4$ , we have  $\mathbb{P}(\mathcal{E}_5) \geq 1 - c_0 n^{-c_1}$ .

*Proof.* For a fixed row index  $s$  ( $1 \leq s \leq n$ ), we have

$$\begin{aligned}&\mathbb{P}(\|\mathbf{X}\mathbf{X}_{s,:}\|_2 \gtrsim (\log n)\sqrt{np}) \\ &\stackrel{\textcircled{1}}{\leq} \mathbb{P}(\|(\mathbf{X} - \mathbf{X}_{\setminus(s)})\mathbf{X}_{s,:}\|_2 \gtrsim p \log n) + \mathbb{P}(\|\mathbf{X}_{\setminus(s)}\mathbf{X}_{s,:}\|_2 \gtrsim (\log n)\sqrt{np}) \\ &\stackrel{\textcircled{2}}{\leq} \underbrace{\mathbb{P}(\|\mathbf{X}_{s,:}\|_2 + \|\mathbf{X}'_{s,:}\|_2) \|\mathbf{X}_{s,:}\|_2 \gtrsim p \log n}_{\triangleq \zeta_1} + \underbrace{\mathbb{P}(\|\mathbf{X}_{\setminus(s)}\mathbf{X}_{s,:}\|_2 \gtrsim (\log n)\sqrt{np})}_{\triangleq \zeta_2},\end{aligned}$$

where in  $\textcircled{1}$  we use the union bound and the fact  $n \geq p$ ; and in  $\textcircled{2}$  we use the definition of  $\mathbf{X}_{\setminus(s)}$  such that the difference  $\mathbf{X} - \mathbf{X}_{\setminus(s)}$  only have non-zero elements in the  $s$ th column. Conditional on the intersection of events  $\mathcal{E}_2 \cap \mathcal{E}_3 \cap \mathcal{E}_4$ , we conclude that probability  $\zeta_1$  is zero and probability  $\zeta_2$  is upper-bounded as

$$\begin{aligned}\mathbb{P}(\|\mathbf{X}_{\setminus(s)}\mathbf{X}_{s,:}\|_2 \gtrsim (\log n)\sqrt{np}) &\leq \mathbb{P}\left(\left|\|\mathbf{X}_{\setminus(s)}\mathbf{X}_{s,:}\|_2^2 - \|\mathbf{X}_{\setminus(s)}\|_F^2\right| \gtrsim (\log^2 n)np\right) \\ &\leq \exp\left(-c_0 \left(\frac{(\log^2 n)np}{\|\mathbf{X}_{\setminus(s)}^\top \mathbf{X}_{\setminus(s)}\|_{\text{OP}}} \wedge \frac{(\log n)^4 n^2 p^2}{\|\mathbf{X}_{\setminus(s)}^\top \mathbf{X}_{\setminus(s)}\|_F^2}\right)\right) \leq n^{-c}.\end{aligned}$$

Thus the proof is completed by invoking the union bound since

$$\mathbb{P}(\|\mathbf{X}\mathbf{X}_{s,:}\|_2 \gtrsim (\log n)\sqrt{np}, \forall s) \leq n \cdot \mathbb{P}(\|\mathbf{X}\mathbf{X}_{s,:}\|_2 \gtrsim (\log n)\sqrt{np}) \leq n(\zeta_1 + \zeta_2) \leq n^{1-c} = n^{-c'}.$$

□

**Lemma 9.** Conditional on  $\mathcal{E}_4$ , we have  $\mathbb{P}(\mathcal{E}_6) \geq 1 - c_0 p^{-2}$ .

*Proof.* We assume that the first  $h$  rows of  $\mathbf{X}$  are permuted w.l.o.g. Due to the iid distribution of  $\{\mathbf{X}_{i,:}\}_{i=1}^n$  and  $\{\mathbf{X}'_{i,:}\}_{i=1}^n$ , we conclude

$$\mathbb{P}(\mathcal{E}_6) \leq n^2 \mathbb{P}\left(\left\|\mathbf{B}^* - \tilde{\mathbf{B}}\right\|_2 \gtrsim \frac{(\log n)(\log n^2 p^3)\sqrt{p}}{\sqrt{n}} \|\mathbf{B}^*\|_F\right). \quad (29)$$

First, we expand  $\mathbf{X}^\top \Pi^* \mathbf{X}$  as

$$\mathbf{X}^\top \Pi^* \mathbf{X} = \sum_{i=1}^h \mathbf{X}_{\pi(i),:} \mathbf{X}_{i,:}^\top + \sum_{i=h+1}^n \mathbf{X}_{i,:} \mathbf{X}_{i,:}^\top,$$

and obtain

$$\mathbb{P}\left(\left\|\mathbf{B}^* - \tilde{\mathbf{B}}\right\|_2 \gtrsim \frac{(\log n)(\log n^2 p^3)\sqrt{p}}{\sqrt{n}} \|\mathbf{B}^*\|_F\right)$$

$$\begin{aligned}
&\leq \mathbb{P} \left( \frac{1}{n-h} \left\| \sum_{i=1}^h \mathbf{X}_{\pi(i),:} \mathbf{X}_{i,:}^\top \mathbf{B}^* \right\|_{\text{F}} + \frac{1}{n-h} \left\| \sum_{i=h+1}^n (\mathbf{X}_{i,:} \mathbf{X}_{i,:}^\top - \mathbf{I}) \mathbf{B}^* \right\|_{\text{F}} \gtrsim \frac{(\log n)(\log n^2 p^3) \sqrt{p}}{\sqrt{n}} \|\mathbf{B}^*\|_{\text{F}} \right) \\
&\stackrel{\textcircled{1}}{\leq} \underbrace{\mathbb{P} \left( \frac{1}{n-h} \left\| \sum_{i=1}^h \mathbf{X}_{\pi(i),:} \mathbf{X}_{i,:}^\top \mathbf{B}^* \right\|_{\text{F}} \gtrsim \frac{(\log n)(\log n^2 p^3) \sqrt{p}}{\sqrt{n}} \|\mathbf{B}^*\|_{\text{F}} \right)}_{\zeta_1} \\
&+ \underbrace{\mathbb{P} \left( \frac{1}{n-h} \left\| \sum_{i=h+1}^n (\mathbf{X}_{i,:} \mathbf{X}_{i,:}^\top - \mathbf{I}) \mathbf{B}^* \right\|_{\text{F}} \gtrsim \frac{(\log n)(\log n^2 p^3) \sqrt{p}}{\sqrt{n}} \|\mathbf{B}^*\|_{\text{F}} \right)}_{\zeta_2},
\end{aligned}$$

where  $\textcircled{1}$  is because of the union bound. The proof is complete by proving  $\zeta_1 \leq 6n^{-2}p^{-2}$  and  $\zeta_2 \leq 4n^{-2}p^{-2}$ . The computation details come as follows.

**Phase I: Bounding  $\zeta_1$ .** According to Lemma 8 in Pananjady et al. [2018] (restated as Lemma 14), we can decompose the set  $\{j : \pi(j) \neq j\}$  into three disjoint sets  $\mathcal{I}_i$ ,  $1 \leq i \leq 3$ , such that  $j$  and  $\pi(j)$  does not lie in the same set. And the cardinality of set  $\mathcal{I}_i$  is  $h_i$  satisfies  $\lfloor h/5 \rfloor \leq h_i \leq h/3$ . Adopting the union bound, we can upper-bound  $\zeta_1$  as

$$\begin{aligned}
\zeta_1 &\leq \sum_{i=1}^3 \mathbb{P} \left( \frac{1}{n-h} \left\| \sum_{j \in \mathcal{I}_i} \mathbf{X}_{\pi(j),:} \mathbf{X}_{j,:}^\top \mathbf{B}^* \right\|_{\text{F}} \gtrsim \frac{(\log n)(\log n^2 p^3) \sqrt{p}}{\sqrt{n}} \|\mathbf{B}^*\|_{\text{F}} \right) \\
&\leq \sum_{i=1}^3 \mathbb{P} \left( \frac{1}{n-h} \left\| \sum_{j \in \mathcal{I}_i} \mathbf{X}_{\pi(j),:} \mathbf{X}_{j,:}^\top \right\|_{\text{OP}} \gtrsim \frac{(\log n)(\log n^2 p^3) \sqrt{p}}{\sqrt{n}} \right). \tag{30}
\end{aligned}$$

Defining  $\mathbf{Z}_i$  as  $\mathbf{Z}_i = \sum_{j \in \mathcal{I}_i} \mathbf{X}_{\pi(j),:} \mathbf{X}_{j,:}^\top$ , we would bound the above probability by invoking the matrix Bernstein inequality (Theorem 7.3.1 in Tropp [2015]). First, we have

$$\mathbb{E}(\mathbf{X}_{\pi(j),:} \mathbf{X}_{j,:}^\top) = (\mathbb{E} \mathbf{X}_{\pi(j),:}) (\mathbb{E} \mathbf{X}_{j,:})^\top = \mathbf{0},$$

due to the independence between  $\mathbf{X}_{\pi(j),:}$  and  $\mathbf{X}_{j,:}$ . Then we upper bound  $\|\mathbf{X}_{\pi(j),:} \mathbf{X}_{j,:}^\top\|_2$  as

$$\|\mathbf{X}_{\pi(j),:} \mathbf{X}_{j,:}^\top\|_2 \stackrel{\textcircled{2}}{=} \|\mathbf{X}_{\pi(j),:} \mathbf{X}_{j,:}^\top\|_{\text{F}} \stackrel{\textcircled{3}}{=} \|\mathbf{X}_{\pi(j),:}\|_2 \|\mathbf{X}_{j,:}\|_2 \stackrel{\textcircled{4}}{\lesssim} p \log n,$$

where  $\textcircled{2}$  is because  $\mathbf{X}_{\pi(j),:} \mathbf{X}_{j,:}^\top$  is rank-1,  $\textcircled{3}$  is due to the fact  $\|\mathbf{u} \mathbf{v}^\top\|_{\text{F}}^2 = \text{Tr}(\mathbf{u} \mathbf{v}^\top \mathbf{v} \mathbf{u}^\top) = \|\mathbf{u}\|_2^2 \|\mathbf{v}\|_2^2$  for arbitrary vector  $\mathbf{u}, \mathbf{v} \in \mathbb{R}^p$ , and  $\textcircled{4}$  is because of event  $\mathcal{E}_3$ .

In the end, we compute  $\mathbb{E}(\mathbf{Z}_i \mathbf{Z}_i^\top)$  and  $\mathbb{E}(\mathbf{Z}_i^\top \mathbf{Z}_i)$  as

$$\begin{aligned}
\mathbb{E}(\mathbf{Z}_i \mathbf{Z}_i^\top) &= \mathbb{E} \left( \sum_{j_1, j_2 \in \mathcal{I}_i} \mathbf{X}_{\pi(j_1),:} \mathbf{X}_{j_1,:}^\top \mathbf{X}_{j_2,:} \mathbf{X}_{\pi(j_2),:}^\top \right) \stackrel{\textcircled{5}}{=} \mathbb{E} \left( \sum_{j \in \mathcal{I}_i} \mathbf{X}_{\pi(j),:} \mathbf{X}_{j,:}^\top \mathbf{X}_{j,:} \mathbf{X}_{\pi(j),:}^\top \right) \\
&\stackrel{\textcircled{6}}{=} \mathbb{E} \left( \sum_{j \in \mathcal{I}_i} \mathbf{X}_{\pi(j),:} \mathbb{E}(\mathbf{X}_{j,:}^\top \mathbf{X}_{j,:}) \mathbf{X}_{\pi(j),:}^\top \right) = p \left( \sum_{j \in \mathcal{I}_i} \mathbb{E} \mathbf{X}_{\pi(j),:} \mathbf{X}_{\pi(j),:}^\top \right) = p h_i \mathbf{I}_{p \times p} = \mathbb{E}(\mathbf{Z} \mathbf{Z}^\top),
\end{aligned}$$

where  $\textcircled{5}$  and  $\textcircled{6}$  is because of the fact such that  $j$  and  $\pi(j)$  are not within the set  $\mathcal{I}_i$  simultaneously. To sum up, we invoke the matrix Bernstein inequality (Theorem 7.3.1 in Tropp [2015]) and have

$$\begin{aligned}
\frac{1}{n-h} \left\| \sum_{j \in \mathcal{I}} \mathbf{X}_{\pi(j),:} \mathbf{X}_{j,:}^\top \right\|_{\text{OP}} &\leq \frac{p(\log n) \log(n^2 p^3)}{3(n-h)} + \frac{\sqrt{p^2(\log^2 n) \log^2(n^2 p^3) + 18 p h_i \log(n^2 p^3)}}{(n-h)} \\
&\stackrel{\textcircled{7}}{\lesssim} \frac{p(\log n) \log(n^2 p^3)}{n} + \frac{p}{n} \sqrt{(\log^2 n) \log^2(n^2 p^3) + \frac{n}{p} \log(n^2 p^3)}
\end{aligned}$$

$$\stackrel{\textcircled{8}}{\lesssim} \frac{p(\log n) \log(n^2 p^3)}{n} + \frac{(\log n)(\log n^2 p^3) \sqrt{p}}{\sqrt{n}} \stackrel{\textcircled{9}}{\lesssim} \frac{(\log n)(\log n^2 p^3) \sqrt{p}}{\sqrt{n}}$$

holds with probability  $1 - 2(np)^{-2}$ , where in  $\textcircled{7}$ ,  $\textcircled{8}$ , and  $\textcircled{9}$  we use the fact such that  $h \leq n/4$ ,  $h_i \leq h/3$ . Hence we can show  $\zeta_1$  in (30) to be less than  $6n^{-2}p^{-2}$ .

**Phase II: Bounding  $\zeta_2$ .** We upper bound  $\zeta_2$  as

$$\begin{aligned} \zeta_2 &\leq \mathbb{P} \left( \frac{1}{n-h} \left\| \sum_{i=h+1}^n (\mathbf{X}_{i,:} \mathbf{X}_{i,:}^\top - \mathbf{I}) \mathbf{B}^* \right\|_{\text{F}} \geq \frac{(\log n)(\log n^2 p^3) \sqrt{p}}{\sqrt{n}} \|\mathbf{B}^*\|_{\text{F}} \right) \\ &\leq \mathbb{P} \left( \left\| \sum_{i=h+1}^n (\mathbf{X}_{i,:} \mathbf{X}_{i,:}^\top - \mathbf{I}) \right\|_{\text{OP}} \gtrsim (\log n)(\log n^2 p^3) \sqrt{np} \right). \end{aligned}$$

Similar to above, we define  $\tilde{\mathbf{Z}}_i = \mathbf{X}_{i,:} \mathbf{X}_{i,:}^\top - \mathbf{I}$ . First, we verify that  $\mathbb{E} \tilde{\mathbf{Z}}_i = \mathbf{0}$  and  $\mathbf{Z}_i$  are independent. Then we bound  $\|\mathbf{Z}\|_{\text{OP}}$  as

$$\|\mathbf{Z}\|_{\text{OP}} \leq \|\mathbf{X}_{i,:} \mathbf{X}_{i,:}^\top\|_{\text{OP}} + \|\mathbf{I}\|_{\text{OP}} \stackrel{\textcircled{A}}{=} \|\mathbf{X}_{i,:}\|_2^2 + 1 \stackrel{\textcircled{B}}{\lesssim} p \log n + 1 \lesssim p \log n,$$

where in  $\textcircled{A}$  we use  $\|\mathbf{u} \mathbf{u}^\top\|_{\text{OP}} = \|\mathbf{u}\|_2^2$  for arbitrary vector  $\mathbf{u}$ , in  $\textcircled{B}$  we condition on event  $\mathcal{E}_4$ . In the end, we compute  $\mathbb{E}(\mathbf{Z}_i \mathbf{Z}_i^\top)$  as

$$\mathbb{E}(\mathbf{Z}_i \mathbf{Z}_i^\top) = \mathbb{E} \left( \|\mathbf{X}_{i,:}\|_2^2 \mathbf{X}_{i,:} \mathbf{X}_{i,:}^\top \right) - \mathbf{I} \preceq p \log n (\mathbb{E}(\mathbf{X}_{i,:} \mathbf{X}_{i,:}^\top)) - \mathbf{I} \preceq (p \log n) \mathbf{I}.$$

Invoking the matrix Bernstein inequality (Theorem 7.3.1 in Tropp [2015]), we conclude

$$\zeta_2 \leq 4p \exp \left( -\frac{3n(\log n) \log^2(n^2 p^3)}{\sqrt{np}(\log n) \log(n^2 p^3) + 6} \right) \stackrel{\textcircled{C}}{\leq} 4n^{-2}p^{-2},$$

where in  $\textcircled{C}$  we use the fact  $n \gtrsim p$ . □

**Lemma 10.** *Conditional on the intersection of events  $\mathcal{E}_2 \cap \mathcal{E}_3$ , we conclude*

$$\left\| \left( \tilde{\mathbf{B}} - \tilde{\mathbf{B}}_{\setminus(s)} \right)^\top \mathbf{X}_{s,:} \right\|_2 \lesssim \frac{p \log n}{n} \|\mathbf{B}^*\|_{\text{F}}.$$

*Proof.* Here we focus on the case when  $\pi(s) = s$ . The proof of the case when  $\pi(s) \neq s$  can be completed effortlessly by following a similar strategy. First, we notice

$$\begin{aligned} \left\| \left( \tilde{\mathbf{B}} - \tilde{\mathbf{B}}_{\setminus(s)} \right)^\top \mathbf{X}_{s,:} \right\|_2 &= (n-h)^{-1} \left\| \mathbf{B}^{*\top} \left( \tilde{\mathbf{X}}_{s,:} \tilde{\mathbf{X}}_{s,:}^\top - \mathbf{X}_{s,:} \mathbf{X}_{s,:}^\top \right) \mathbf{X}_{s,:} \right\|_2 \\ &\leq (n-h)^{-1} \left( \left| \langle \mathbf{X}_{s,:}, \tilde{\mathbf{X}}_{s,:} \rangle \right| \left\| \mathbf{B}^{*\top} \tilde{\mathbf{X}}_{s,:} \right\|_2 + \|\mathbf{X}_{s,:}\|_2^2 \cdot \left\| \mathbf{B}^{*\top} \mathbf{X}_{s,:} \right\|_2 \right). \end{aligned}$$

Conditional on the intersection of events  $\mathcal{E}_2 \cap \mathcal{E}_3$ , we conclude

$$\left\| \left( \tilde{\mathbf{B}}_{\setminus(s)} - \tilde{\mathbf{B}} \right)^\top \mathbf{X}_{s,:} \right\|_2 \lesssim \frac{p \log n}{n-h} \|\mathbf{B}^*\|_{\text{F}} \asymp \frac{p \log n}{n} \|\mathbf{B}^*\|_{\text{F}}.$$

□

Following the same strategy, we can prove that

**Lemma 11.** *Conditional on the intersection of events  $\mathcal{E}_2 \cap \mathcal{E}_3$ , we conclude*

$$\left\| \left( \tilde{\mathbf{B}} - \tilde{\mathbf{B}}_{\setminus(s,t)} \right)^\top \mathbf{X}_{s,:} \right\|_2 \lesssim \frac{p \log n}{n} \|\mathbf{B}^*\|_{\text{F}}.$$

**Lemma 12.** *Conditional on the intersection of events  $\mathcal{E}_6 \cap \mathcal{E}_7 \cap \mathcal{E}_8$ , we conclude  $\mathbb{P}(\mathcal{E}_9) \geq 1 - c_0 n^{-c_1}$ .*

*Proof.* We adopt the leave-one-out trick and construct the matrix  $\tilde{\mathbf{B}}_{\setminus(i)}$  as

$$\tilde{\mathbf{B}}_{\setminus(i)} = (n-h)^{-1} \left( \sum_{\substack{k \neq i \\ \pi^*(k) \neq i}} \mathbf{X}_{\pi(k),:} \mathbf{X}_{k,:}^\top + \sum_{\substack{k=i \\ \pi^*(k) \neq i}} \tilde{\mathbf{X}}_{\pi(k),:} \tilde{\mathbf{X}}_{k,:}^\top \right) \mathbf{B}^*,$$

where  $\tilde{\mathbf{X}}_{i,:}$  are the independent copy of  $\mathbf{X}_{i,:}$ . Adopting the union bound, we conclude

$$\begin{aligned} & \mathbb{P} \left( \left\| (\tilde{\mathbf{B}} - \mathbf{B}^*)^\top \mathbf{X}_{i,:} \right\|_2 \gtrsim \frac{(\log n)^{3/2} (\log n^2 p^3) \sqrt{p}}{\sqrt{n}} \|\mathbf{B}^*\|_{\text{F}} \right) \\ & \leq \mathbb{P} \left( \left\| (\mathbf{B}^* - \tilde{\mathbf{B}}_{\setminus(i)})^\top \mathbf{X}_{i,:} \right\|_2 + \left\| (\tilde{\mathbf{B}}_{\setminus(i)} - \tilde{\mathbf{B}})^\top \mathbf{X}_{i,:} \right\|_2 \gtrsim \frac{(\log n)^{3/2} (\log n^2 p^3) \sqrt{p}}{\sqrt{n}} \|\mathbf{B}^*\|_{\text{F}} \right) \\ & \leq \underbrace{\mathbb{P} \left( \left\| (\mathbf{B}^* - \tilde{\mathbf{B}}_{\setminus(i)})^\top \mathbf{X}_{i,:} \right\|_2 \gtrsim \frac{(\log n)^{3/2} (\log n^2 p^3) \sqrt{p}}{\sqrt{n}} \|\mathbf{B}^*\|_{\text{F}} \right)}_{\triangleq \zeta_1} \\ & \quad + \underbrace{\mathbb{P} \left( \left\| (\tilde{\mathbf{B}}_{\setminus(i)} - \tilde{\mathbf{B}})^\top \mathbf{X}_{i,:} \right\|_2 \gtrsim \frac{p \log n}{n} \|\mathbf{B}^*\|_{\text{F}} \right)}_{\triangleq \zeta_2}. \end{aligned}$$

First, we study the probability  $\zeta_1$ . Due to the construction of  $\tilde{\mathbf{B}}_{\setminus(i)}$ , we have  $\mathbf{X}_{i,:}$  to be independent of  $\mathbf{B}^* - \tilde{\mathbf{B}}_{\setminus(i)}$ . Conditional on  $\mathbf{B}^* - \tilde{\mathbf{B}}_{\setminus(i)}$ , we conclude

$$\zeta_1 \stackrel{\textcircled{1}}{\leq} \mathbb{P} \left( \left\| (\mathbf{B}^* - \tilde{\mathbf{B}}_{\setminus(i)})^\top \mathbf{X}_{i,:} \right\|_2 \geq \sqrt{\log n} \left\| \mathbf{B}^* - \tilde{\mathbf{B}}_{\setminus(i)} \right\|_{\text{F}} \right) \leq n^{-c},$$

where in  $\textcircled{1}$  we condition on event  $\mathcal{E}_6$  such that  $\left\| \mathbf{B}^* - \tilde{\mathbf{B}}_{\setminus(i)} \right\|_{\text{F}} \lesssim (\log n) (\log n^2 p^3) \sqrt{p/n} \|\mathbf{B}^*\|_{\text{F}}$ . As for probability  $\zeta_2$ , we conclude it to be zero conditional on  $\mathcal{E}_7$ . Thus the proof is completed.  $\square$

## 5 SUPPLEMENTARY MATERIAL: USEFUL FACTS

This section lists some useful facts for the sake of self-containing.

**Lemma 13.** *For a  $\chi^2$ -RV  $Z$  with  $\ell$  freedom, we have*

$$\begin{aligned} \mathbb{P}(Z \leq t) & \leq \exp \left( \frac{\ell}{2} \left( \log \frac{t}{\ell} - \frac{t}{\ell} + 1 \right) \right), \quad t < \ell; \\ \mathbb{P}(Z \geq t) & \leq \exp \left( \frac{\ell}{2} \left( \log \frac{t}{\ell} - \frac{t}{\ell} + 1 \right) \right), \quad t > \ell. \end{aligned}$$

**Lemma 14** (Lemma 8 in Pananjady et al. [2018]). *Consider an arbitrary permutation map  $\pi$  with Hamming distance  $k$  from the identity map, i.e.,  $d_{\text{H}}(\pi, \mathbf{I}) = h$ . We define the index set  $\{i : i \neq \pi(i)\}$  and can decompose it into 3 independent sets  $\mathcal{I}_i$  ( $1 \leq i \leq 3$ ) such that the cardinality of each set satisfies  $|\mathcal{I}_i| \geq \lfloor h/3 \rfloor \geq h/5$ .*

**Lemma 15** (Theorem 1.3 in Paouris [2012]). *Let  $\mathbf{g} \in \mathbb{R}^n$  be an isotropic log-concave random vector with sub-gaussian constant  $K$ , and  $\mathbf{A}$  is a non-zero  $n \times n$  matrix. For any  $\mathbf{y} \in \mathbb{R}^n$  and  $\varepsilon \in (0, c_1)$ , one has*

$$\mathbb{P}(\|\mathbf{y} - \mathbf{A}\mathbf{g}\|_2 \leq \varepsilon \|\mathbf{A}\|_{\text{F}}) \leq \exp(\kappa(K) \text{srnk}(\mathbf{A}) \log \varepsilon),$$

where  $\kappa = c_1/K^2$ .

## References

- Yuxin Chen, Yuejie Chi, Jianqing Fan, Cong Ma, and Yuling Yan. Noisy matrix completion: Understanding statistical guarantees for convex relaxation via nonconvex optimization. *SIAM J. Optim.*, 30(4):3098–3121, 2020.
- Noureddine El Karoui. Asymptotic behavior of unregularized and ridge-regularized high-dimensional robust regression estimators: rigorous results. *arXiv preprint arXiv:1311.2445*, 2013.
- Noureddine EL Karoui. On the impact of predictor geometry on the performance on high-dimensional ridge-regularized generalized robust regression estimators. *Probability Theory and Related Fields*, 170(1-2):95–175, 2018.
- Noureddine El Karoui, Derek Bean, Peter J Bickel, Chinghway Lim, and Bin Yu. On robust regression with high-dimensional predictors. *Proceedings of the National Academy of Sciences*, 110(36):14557–14562, 2013.
- Ashwin Pananjady, Martin J. Wainwright, and Thomas A. Courtade. Linear regression with shuffled data: Statistical and computational limits of permutation recovery. *IEEE Trans. Inf. Theory*, 64(5):3286–3300, 2018.
- Grigoris Paouris. Small ball probability estimates for log-concave measures. *Transactions of the American Mathematical Society*, 364(1):287–308, 2012.
- Pragya Sur, Yuxin Chen, and Emmanuel J Candès. The likelihood ratio test in high-dimensional logistic regression is asymptotically a rescaled chi-square. *Probability Theory and Related Fields*, 175(1):487–558, 2019.
- Joel A. Tropp. An introduction to matrix concentration inequalities. *Found. Trends Mach. Learn.*, 8(1-2):1–230, 2015.
- Roman Vershynin. *High-dimensional probability: An introduction with applications in data science*, volume 47. Cambridge university press, 2018.
